# Supplementary material for: Illness Perception and Medication Adherence among Adult Patients with Type 2 Diabetes Mellitus: A Scoping Review
Source: MDPI journal article supplement (doi:10.3390/clinpract13010007), 2023-01-03
Supplement: s1 [file s1]

### Supplementary B. Quality assessment of included studies.

| Author(s), year of publication | Abstract and title | Introduction and aims | Method and data | Sampling | Data analysis | Ethics and bias | Findings/ results | Transferability/generalizability | Implications and usefulness | Total scoring /36 |
|--------------------------------|--------------------|-----------------------|-----------------|----------|---------------|-----------------|-------------------|----------------------------------|-----------------------------|-------------------|
| Alatawi et al. (2016)          | 4                  | 4                     | 3               | 4        | 3             | 4               | 4                 | 4                                | 4                           | 34                |
| Albargawi et al. (2016)        | 4                  | 4                     | 4               | 4        | 4             | 4               | 4                 | 4                                | 4                           | 36                |
| Butt et al. (2016)             | 4                  | 4                     | 4               | 4        | 4             | 4               | 4                 | 3                                | 4                           | 35                |
| Farhat et al. (2018)           | 4                  | 4                     | 4               | 4        | 4             | 3               | 4                 | 3                                | 4                           | 34                |
| Hashimoto et al. (2019)        | 4                  | 4                     | 4               | 4        | 4             | 4               | 4                 | 3                                | 3                           | 34                |
| He et al. (2017)               | 4                  | 4                     | 4               | 4        | 4             | 4               | 4                 | 4                                | 4                           | 36                |
| Jannoo and Khan (2019)         | 4                  | 4                     | 4               | 3        | 4             | 2               | 4                 | 4                                | 4                           | 33                |
| Koponen et al. (2016)          | 4                  | 4                     | 4               | 4        | 4             | 4               | 4                 | 3                                | 4                           | 35                |
| Kugbey et al. (2017)           | 4                  | 4                     | 4               | 3        | 3             | 4               | 4                 | 4                                | 4                           | 34                |
| Lee et al. (2016)              | 4                  | 2                     | 3               | 3        | 4             | 4               | 4                 | 4                                | 4                           | 32                |
| Lee et al. (2017)              | 4                  | 4                     | 4               | 4        | 3             | 3               | 4                 | 4                                | 3                           | 33                |
| Matza et al. (2018)            | 3                  | 3                     | 4               | 4        | 3             | 4               | 4                 | 4                                | 3                           | 32                |
| Nazir et al. (2016)            | 4                  | 4                     | 4               | 3        | 4             | 4               | 4                 | 3                                | 3                           | 33                |
| Nie et al. (2018)              | 4                  | 4                     | 3               | 3        | 4             | 4               | 4                 | 4                                | 4                           | 34                |

|                             |   |   |   |   |   |   |   |   |   |    |
|-----------------------------|---|---|---|---|---|---|---|---|---|----|
| Shiyanbola et al.<br>(2018) | 3 | 4 | 4 | 4 | 4 | 4 | 4 | 4 | 4 | 35 |
| AlQarni et al.<br>(2019)    | 4 | 4 | 4 | 3 | 4 | 4 | 4 | 4 | 4 | 35 |
| Alyami et al.<br>(2019)     | 4 | 4 | 4 | 3 | 4 | 2 | 4 | 4 | 4 | 33 |
| Kretchy et al.<br>(2020)    | 4 | 4 | 4 | 4 | 4 | 3 | 4 | 3 | 4 | 34 |
| Bilondi et al.<br>(2021)    | 4 | 4 | 4 | 4 | 4 | 4 | 4 | 3 | 4 | 35 |
| Islam et al. (2021)         | 4 | 4 | 4 | 3 | 3 | 4 | 4 | 4 | 4 | 34 |
