# Supplementary material for: Illness Perception and Medication Adherence among Adult Patients with Type 2 Diabetes Mellitus: A Scoping Review
Source: MDPI journal article supplement (doi:10.3390/clinpract13010007), 2023-01-03
Supplement: s1 [file s1]

### Supplementary A: Data Extraction Table

| Study Reference       | Country of Origin | Total Sample | Study Design          | Types of Participants | Intervention Group | Control/ Placebo/ Comparison Group | Duration of Intervention | Follow Up | Outcome Measures                                                                            | Main Findings                                                                              | Additional Comments                     |
|-----------------------|-------------------|--------------|-----------------------|-----------------------|--------------------|------------------------------------|--------------------------|-----------|---------------------------------------------------------------------------------------------|--------------------------------------------------------------------------------------------|-----------------------------------------|
| Bilondi et al. (2021) | Iran              | 260          | cross-sectional study | Adults with T2DM      | -                  | -                                  | -                        | -         | the relationship between illness perception and medication adherence in patients with T2DM. | illness perception as moderate and low medication adherence                                | The study is valid and highly reliable. |
| Kretchy et al. (2020) | Ghana             | 188          | cross-sectional study | Adults with T2DM      | -                  | -                                  | -                        | -         | distress associated with T2DM and to examine its association with medication adherence      | 44.7% of the patients recorded high levels of diabetes-related distress. 66.5% of had Poor | The study is valid and highly reliable. |

|                       |              |     |                        |                                   |   |   |   |   |                                                                                            | adherence to medications                                                                                                 |                                                                    |
|-----------------------|--------------|-----|------------------------|-----------------------------------|---|---|---|---|--------------------------------------------------------------------------------------------|--------------------------------------------------------------------------------------------------------------------------|--------------------------------------------------------------------|
| Islam et al. (2021)   | Bangladesh   | 500 | cross-sectional study  | Adults with T2DM                  | - | - | - | - | T2DM medication adherence and factors associated with low adherence                        | 42.8% of participants reported low medication adherence, age was negatively associated with low adherence                | The study was valid and highly reliable as well as generalisable . |
| Alatawi et al. (2016) | Saudi Arabia | 220 | Cross-sectional design | Adults with T2DM aged 20–79 years | - | - | - | - | T2DM medication adherence, medication-taking behaviours, health beliefs, and complications | 58.0% of the responders were on oral drugs and insulin, and 16.7% had knowledge of HbA1c. 40.0% had low adherence to the | The study was valid and highly reliable as well as generalisable . |

|                         |              |     |                                |                                |   |   |   |   |                                                                 |                                                                                                                                                                                                         |                                                                                                    |
|-------------------------|--------------|-----|--------------------------------|--------------------------------|---|---|---|---|-----------------------------------------------------------------|---------------------------------------------------------------------------------------------------------------------------------------------------------------------------------------------------------|----------------------------------------------------------------------------------------------------|
|                         |              |     |                                |                                |   |   |   |   |                                                                 | medication due to time and interval of the medications.                                                                                                                                                 |                                                                                                    |
| Albargawi et al. (2016) | Saudi Arabia | 30  | Descriptive correlation design | Arab-speaking adults with T2DM | - | - | - | - | Perceptions towards T2DM medication adherence and self-efficacy | 53.0% of self-efficacy perceptions emerged from godly beliefs. The perceptions shaped health locus of control and medication adherence. Self-care management informed the overall medication adherence. | The study is transferable and applicable to Arab-speaking adults with T2DM and healthcare systems. |
| AlQarni et al. (2019)   | Saudi Arabia | 212 | cross-sectional study          | Adult patients with T2DM       | - | - | - | - | T2DM medication adherence                                       | The patients showed low medication adherence                                                                                                                                                            | The study was valid and highly reliable as well as                                                 |

|                      |              |     |                       |                                                                 |                                                                                          |                                                                                                             |            |   |                                                                                               |                                                                                                                                                               |                                                                   |
|----------------------|--------------|-----|-----------------------|-----------------------------------------------------------------|------------------------------------------------------------------------------------------|-------------------------------------------------------------------------------------------------------------|------------|---|-----------------------------------------------------------------------------------------------|---------------------------------------------------------------------------------------------------------------------------------------------------------------|-------------------------------------------------------------------|
|                      |              |     |                       |                                                                 |                                                                                          |                                                                                                             |            |   |                                                                                               |                                                                                                                                                               | generalisable                                                     |
| Alyami et al. (2019) | Saudi Arabia | 115 | cross-sectional study | Saudi patients with T2DM, in mean age 56±12.43 years (58% male) | -                                                                                        | -                                                                                                           | -          | - | Illness Perceptions, HbA1c, And medication Adherence                                          | 69% patients reported poor medication adherence                                                                                                               | .                                                                 |
| Butt et al. (2016)   | Malaysia     | 73  | RCT                   | T2DM patients attending endocrine clinic                        | The intervention group ( <i>n</i> = 36) received guidance and education from pharmacists | The control group ( <i>n</i> = 37) did not experience intervention and education but received standard care | 3–6 months | - | Morisky scores and QOL on the prevalence of T2DM after HbA1c and overall medication adherence | The intervention group registered increased Morisky scores and QOL, which then led to medical adherence. No significant change was seen in the control group. | The study shows high validity and is replicable in other studies. |
| Farhat et al. (2018) | Lebanon      | 207 | Cross-sectional study | Adult patients with T2DM                                        | -                                                                                        | -                                                                                                           | -          | - | Effectiveness score, QOL score,                                                               | High effectiveness and QOL scores                                                                                                                             | The outcomes are generalisable                                    |

|                         |       |        |                                 |                                                |   |   |   |   |                                                                             |                                                                                                                                            |                                                                                            |
|-------------------------|-------|--------|---------------------------------|------------------------------------------------|---|---|---|---|-----------------------------------------------------------------------------|--------------------------------------------------------------------------------------------------------------------------------------------|--------------------------------------------------------------------------------------------|
|                         |       |        |                                 |                                                |   |   |   |   | BMI, global satisfaction, social relationships, and psychological health    | affected adherence to medications.<br><br>The study considered awareness campaigns as effective.                                           | to the adults with T2DM.                                                                   |
| Hashimoto et al. (2019) | Japan | 157    | Cross-sectional study           | Patients with T2DM a history of diabetes       | - | - | - | - | The link between perceptions of patients with T2DM and medication adherence | The perception of an orderly life led to poor medication adherence.<br><br>Diabetes knowledge and disease determined medication adherence. | The study used a replicable methodology .                                                  |
| He et al. (2017)        | China | 24,192 | Retrospective database analysis | Adults with T2DM who underwent insulin therapy | - | - | - | - | Insulin resistance and persistence to the insulin therapy                   | The patients registered low persistence and adherence to the insulin therapy due                                                           | The study is transferable to patients with T2DM after using a large representative sample. |

|                        |          |       |                       |                                                      |   |   |   |   |                                                                                       |                                                                                                                                                |                                                                                                                                |
|------------------------|----------|-------|-----------------------|------------------------------------------------------|---|---|---|---|---------------------------------------------------------------------------------------|------------------------------------------------------------------------------------------------------------------------------------------------|--------------------------------------------------------------------------------------------------------------------------------|
|                        |          |       |                       |                                                      |   |   |   |   |                                                                                       | to the negative perceptions towards premixed, basal, and prandial insulin.                                                                     |                                                                                                                                |
| Jannoo and Khan (2019) | Malaysia | 497   | Survey                | Adult patients with T2DM aged at least 18 years      | - | - | - | - | Medication adherence, self-care activities, risk factors, and self-care behaviour     | The patients showed moderate medication adherence and low observation of blood sugar testing.                                                  | The study is valid and highly reliable.                                                                                        |
| Koponen et al. (2016)  | Finland  | 2,866 | Cross-sectional study | Adult patients with T2DM with a mean age of 63 years | - | - | - | - | Physical activity, perceived autonomous support, motivation, and self-care competence | Self-care competence increased with perceived autonomy in motivation and seeking support.<br><br>Those who participated in physical activities | The study is replicable and generalisable to the patients with T2DM anchoring their treatment on self-care competence, such as |

|                      |       |                  |                       |                                          |   |   |   |   |                                                                                         |                                                                                                                         |                                                                                          |
|----------------------|-------|------------------|-----------------------|------------------------------------------|---|---|---|---|-----------------------------------------------------------------------------------------|-------------------------------------------------------------------------------------------------------------------------|------------------------------------------------------------------------------------------|
|                      |       |                  |                       |                                          |   |   |   |   |                                                                                         | reported better adherence to treatment and management of T2DM.                                                          | physical exercises.                                                                      |
| Kugbey et al. (2017) | Ghana | 160 participants | Cross-sectional study | 45 males and 115 female adults with T2DM | - | - | - | - | Illness perception and diabetes knowledge, medication adherence and self-care practices | Diabetes knowledge led to increased self-care practices, such as specific diet, exercise, and performance of self-care. | The study is highly valid and reliable to different patients in middle-income countries. |
|                      |       |                  |                       |                                          |   |   |   |   |                                                                                         | Illness perception increased and enhanced blood sugar testing and foot care after acquiring knowledge on T2DM.          |                                                                                          |

|                      |           |     |                        |                                                            |   |   |   |   |                                                                               |                                                                                                                                                                                       |                                                                                                                          |
|----------------------|-----------|-----|------------------------|------------------------------------------------------------|---|---|---|---|-------------------------------------------------------------------------------|---------------------------------------------------------------------------------------------------------------------------------------------------------------------------------------|--------------------------------------------------------------------------------------------------------------------------|
| Lee et al.<br>(2016) | Taiwan    | 295 | Cross-sectional study  | Patients with T2DM attending endocrine clinics             | - | - | - | - | Modifying self-care behaviour and empowerment perceptions and health literacy | Empowerment perceptions emerged from health literacy and subsequent self-efficacy. Self-care behaviour led to improved glycaemic control. Healthcare providers offer health literacy. | The study is generalisable and effective addressing perceptions towards diabetes in the healthcare system.               |
| Lee et al.<br>(2017) | Singapore | 382 | Cross-sectional survey | Adult patients with T2DM in primary care outpatient clinic | - | - | - | - | Medication adherence, associated factors with T2DM                            | Young adult participants registered low perceptions towards T2DM, which then led to poor glycaemic control after attending polytherapy.                                               | The study is generalisable to Asian communities seeking to influence uptake of therapy and medication for managing T2DM. |



|                        |          |     |                          |                                       |   |   |   |   |                                                                                                                  |                                                                                                                                                                             |                                                                                     |
|------------------------|----------|-----|--------------------------|---------------------------------------|---|---|---|---|------------------------------------------------------------------------------------------------------------------|-----------------------------------------------------------------------------------------------------------------------------------------------------------------------------|-------------------------------------------------------------------------------------|
| Matza et al.<br>(2018) | USA      | 404 | Cross-sectional study    | Adult patients with T2DM in 49 states | - | - | - | - | Perceptions towards injection devices for T2DM medicine, scores on liraglutide and dulaglutide injection devices | The study established poor acceptance to T2DM due to the negative perceptions of liraglutide and dulaglutide devices.                                                       | The studies are valid and reliable.                                                 |
| Nazir et al.<br>(2016) | Pakistan | 392 | Cross-sectional analysis | Adult patients with T2DM              | - | - | - | - | Diabetes-related knowledge, treatment adherence, glycaemic control among adult patients with T2DM                | Disease-related knowledge assisted in the increase in glycated haemoglobin levels despite the duration of the disease across participants of varied age groups and genders. | The study is generalisable and transferable to older adults aged at least 50 years. |

|                          |       |     |                       |                                         |   |   |   |   |                                                                                                                             |                                                                                                                                                                                                                  |                                                                                                           |
|--------------------------|-------|-----|-----------------------|-----------------------------------------|---|---|---|---|-----------------------------------------------------------------------------------------------------------------------------|------------------------------------------------------------------------------------------------------------------------------------------------------------------------------------------------------------------|-----------------------------------------------------------------------------------------------------------|
| Nie et al. (2018)        | China | 304 | Cross-sectional study | Chinese patients with T2DM              | - | - | - | - | Patient characteristics, illness perceptions, future risk perceptions, health-promoting self-care behaviour within 6 months | Increased illness and risk perceptions on T2DM led to health-promoting self-care behaviour. Tailoring interventions to meet the needs of diabetic patients increased adherence to treatment in Chinese patients. | The study offers a replicable methodology and transferable findings to Asian communities with T2DM cases. |
| Shiyanbola et al. (2018) | USA   | 174 | Cross-sectional study | Adults with T2DM aged 20 years and over | - | - | - | - | Beliefs about medicine, family medicine clinics and illness perceptions,                                                    | Beliefs about medicine and increased literacy and self-efficacy affected adherence to the medicine. Adherence to the OHAs or                                                                                     | The study is generalisable to U.S. patients and other advanced economies with T2DM as part of             |

---

|                                         |                                                                 |                           |
|-----------------------------------------|-----------------------------------------------------------------|---------------------------|
| numeracy<br>and<br>document<br>literacy | insulin<br>increased due<br>to the self-<br>care<br>initiative. | public health<br>problem. |
|-----------------------------------------|-----------------------------------------------------------------|---------------------------|

---

Note. T2DM = Type 2 Diabetes Mellitus
